# Supplementary material for: An automatic centrifugal system for rapid detection of bacteria based on immunomagnetic separation and recombinase aided amplification
Source: Royal Society of Chemistry journal article supplement (doi:10.1039/d2lc00650b), 2022-01-01
Supplement: d2lc00650b1.pdf [file d2lc00650b1.pdf]

# **An automatic centrifugal system for rapid detection of bacteria based on immunomagnetic separation and recombinase aided amplification**

Siyuan Wang<sup>1,2</sup>, Wuzhen Qi<sup>2</sup>, Shangyi Wu<sup>3</sup>, Jing Yuan<sup>1</sup>, Hong Duan<sup>1</sup>,  
Yanbin Li<sup>4</sup>, Jianhan Lin<sup>1,2\*</sup>

<sup>1</sup>Key Laboratory of Agricultural Information Acquisition Technology,  
Ministry of Agriculture and Rural Affairs, China Agricultural University,  
Beijing 100083, China

<sup>2</sup>Key Laboratory of Smart Agriculture System Integration, Ministry of  
Education, China Agricultural University, Beijing 100083, China

<sup>3</sup>College of Food Science, Shenyang Agricultural University, Shenyang  
110866, China

<sup>4</sup>Department of Biological and Agricultural Engineering, University of  
Arkansas, Fayetteville, AR 72701, USA

\*Corresponding author: Dr. Jianhan Lin, Email: [jianhan@cau.edu.cn](mailto:jianhan@cau.edu.cn)

## Preparation of immune MNPs

The immune MNPs were prepared using EDC method with some modifications<sup>1</sup>. Briefly, 1 mg MNPs were washed with 3 mL PB (0.01 M, pH 6.0) twice and added to a 3 mL mixture including 100  $\mu$ L EDC·HCl (10 mg/mL in PB) and 100  $\mu$ L NHSS (10 mg/mL in PB), shaking at 220 rpm for 1 h at 37 °C to activate the beads. After washing with PB twice to remove surplus EDC·HCl and NHSS, 100  $\mu$ g anti-*Salmonella typhimurium* polyclonal antibodies were added to the beads in 3 mL PB (0.01 M, pH 8.0). The mixture was reacted at 220 rpm for 2 h at 37°C and then blocked with 400  $\mu$ L skimmed milk (100 mg/mL in PB) for 4 h at 37°C with shaking. After washing with PB (0.01 M, pH 8.0) twice, the immune MNPs were resuspended in 1 mL of PB (0.01 M, pH 8.0) containing 15 wt% sucrose and 1 wt% skimmed milk and stored at 4°C.

**Table S1.** Comparison of currently available technologies for bacterial detection.

| Method  | Time (h) | Equipment Cost (US \$) | Consumable Cost (US \$/sample) | Detection limit (CFU/mL) | Ref |
|---------|----------|------------------------|--------------------------------|--------------------------|-----|
| Culture | 48       | ~4,000                 | ~1.5                           | 1                        | 2   |
| PCR     | 1-3      | ~40,000                | ~9                             | 10 <sup>3</sup>          | 3,4 |
| ELISA   | 2-4      | ~32,000                | ~5                             | 10 <sup>4</sup>          | 5,6 |

**Table S2.** Nucleotide sequences of RAA primers and prober<sup>7</sup>

| Primer Type    | Nucleotide Sequence                                                            |
|----------------|--------------------------------------------------------------------------------|
| Probe          | CTCTATTGTCACCGTGGTTCAGTTTATCG(FAM-dT)T(THF)T(BHQ1-dT)ACCAAAGGTTTCAG[C3-spacer] |
| Forward primer | ATTGGCGATAGCCTGGCGGTGGGTTTTGTTGT                                               |
| Reverse primer | TACCGGGCATACCATCCAGAGAAAATCGGGCCGC                                             |

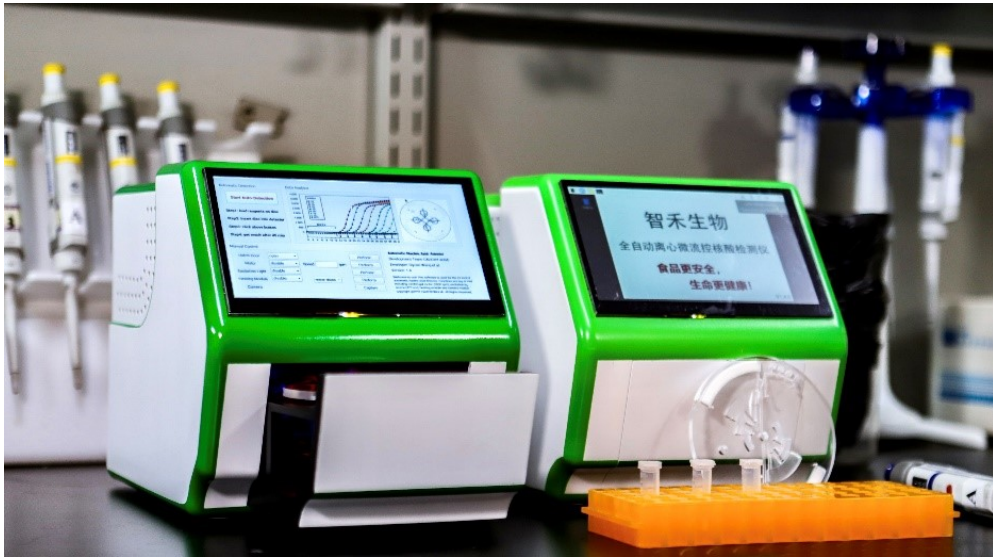

**Fig. S1** The photo of the sample-in-result-out device.

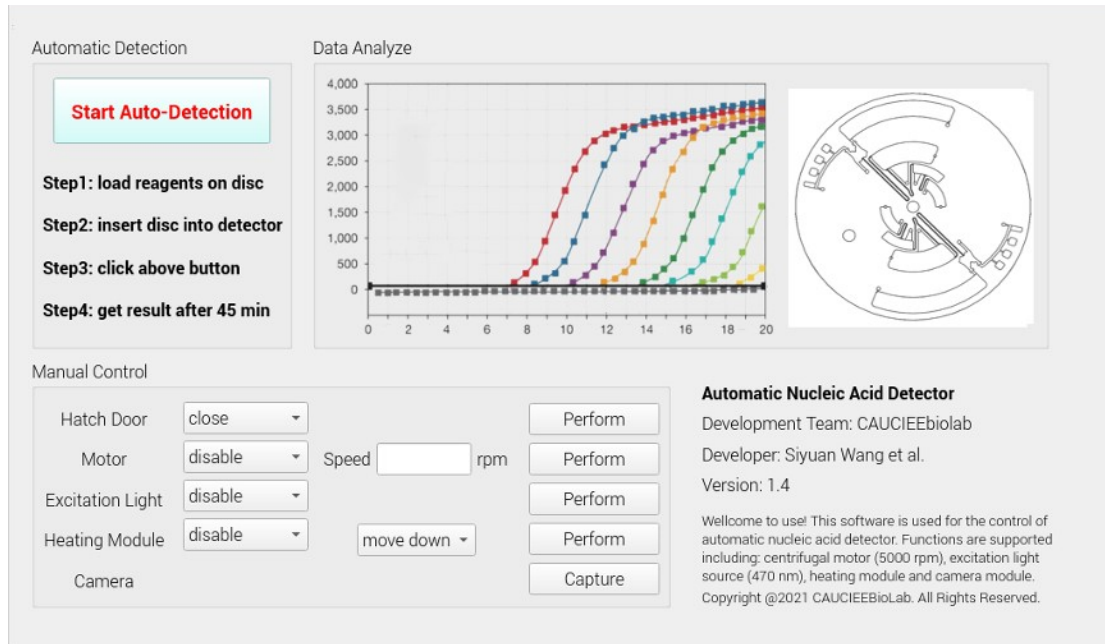

**Fig. S2** The embedded software of the supporting device

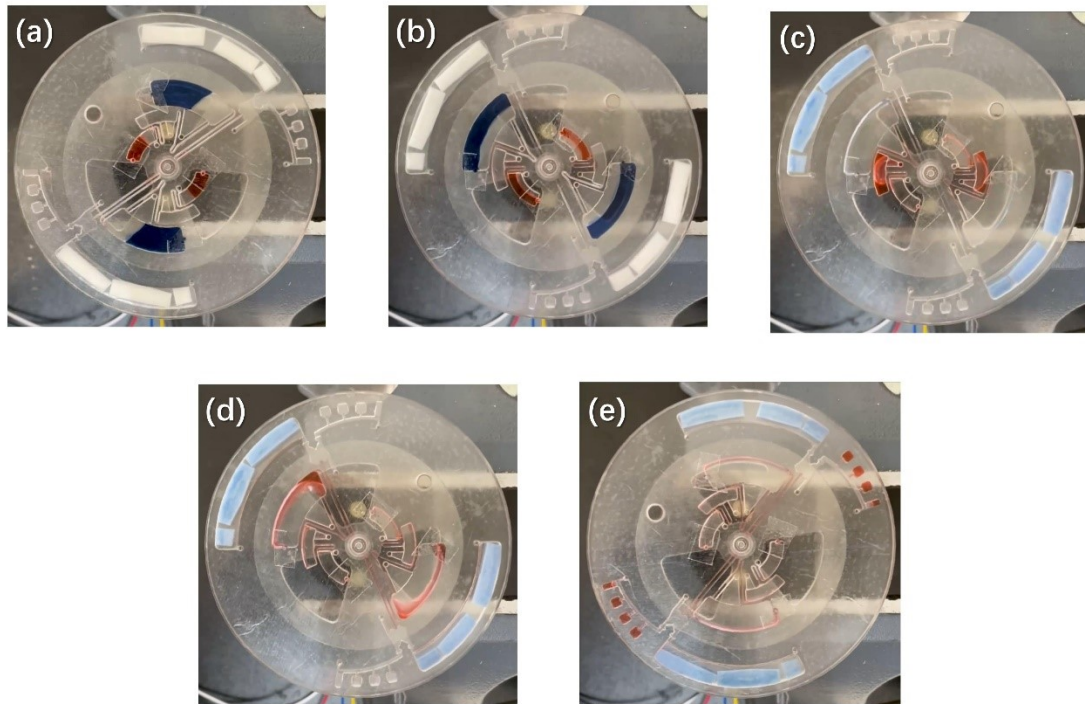

**Fig. S3** The pictures of the centrifugal disc at different stage. (a) After sample and nucleic acid extraction buffer loading. (b) After the first clockwise centrifugation. (c) After the second clockwise centrifugation. (d) After the third clockwise centrifugation. (e) After the fourth counterclockwise centrifugation.

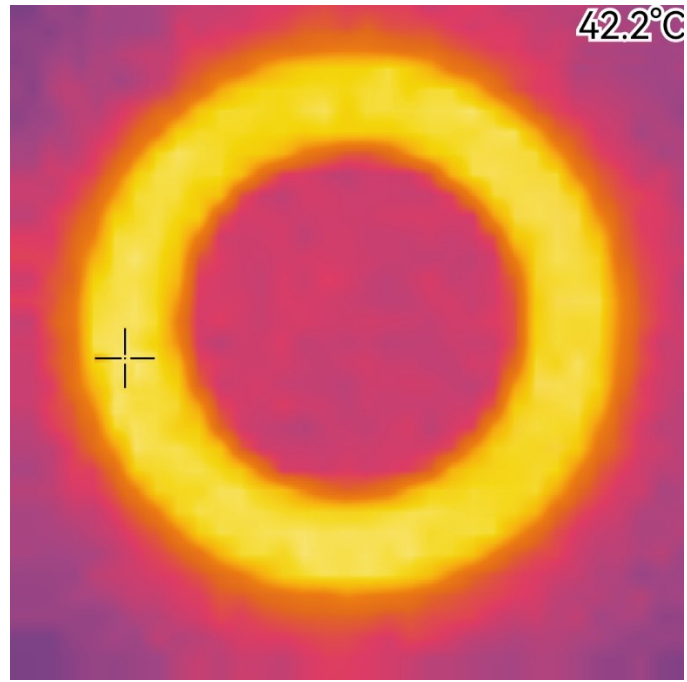

**Fig. S4** The infrared image of the annular heater



## References:

1. Y. Mao, X. L. Huang, S. C. Xiong, H. Y. Xu, Z. P. Aguilar and Y. H. Xiong, *Food Control*, 2016, 59, 601-608.
2. The China Food and Drug Administration <GB4789.2-2016>.
3. C. Huang, B. Y. Mahboubat, Y. Ding, Q. Yang, J. Wang, M. Zhou and X. Wang, *Lwt*, 2021, 142, 111075.
4. The China Food and Drug Administration <GBT28642-2012>.
5. T. Di Febo, M. Schirone, P. Visciano, O. Portanti, G. Armillotta, T. Persiani, E. Di Giannatale, M. Tittarelli and M. Luciani, *Food Analytical Methods*, 2018, 12, 322-330.
6. The China Food and Drug Administration <GB/T22429-2008>.
7. X. Zhang, L. Guo, R. Ma, L. Cong, Z. Wu, Y. Wei, S. Xue, W. Zheng and S. Tang, *Journal of microbiological methods*, 2017, 139, 202-204.
